# Supplementary material
Source: MDPI journal article supplement (https://www.mdpi.com/1996-1073/13/14/3562)
Supplement: s1 [file s1]

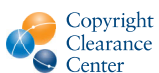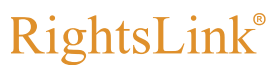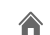

Home

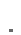

Help

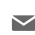

Email Support

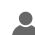

Jay Johnson ▾

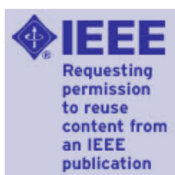

## Experimental Distribution Circuit Voltage Regulation using DER Power Factor, Volt-Var, and Extremum Seeking Control Methods

Conference Proceedings: 2017 IEEE 44th Photovoltaic Specialist Conference (PVSC)

Author: Jay Johnson

Publisher: IEEE

Date: June 2017

Copyright © 2017, IEEE

### Order Completed

Thank you for your order.

This Agreement between Sandia National Laboratories -- Jay Johnson ("You") and IEEE ("IEEE") consists of your license details and the terms and conditions provided by IEEE and Copyright Clearance Center.

Your confirmation email will contain your order number for future reference.

License Number 4864301370446

[Printable Details](#)

License date Jul 08, 2020

#### Licensed Content

|                              |                                                                                                                             |
|------------------------------|-----------------------------------------------------------------------------------------------------------------------------|
| Licensed Content Publisher   | IEEE                                                                                                                        |
| Licensed Content Publication | IEEE Proceedings                                                                                                            |
| Licensed Content Title       | Experimental Distribution Circuit Voltage Regulation using DER Power Factor, Volt-Var, and Extremum Seeking Control Methods |
| Licensed Content Author      | Jay Johnson                                                                                                                 |
| Licensed Content Date        | Jun 1, 2017                                                                                                                 |

#### Order Details

|                                                         |                       |
|---------------------------------------------------------|-----------------------|
| Type of Use                                             | Journal/Magazine      |
| Requestor type                                          | commercial/for-profit |
| Format                                                  | electronic            |
| Portion                                                 | figures/tables/graphs |
| I am an IEEE member OR the author of this IEEE content. | author                |
| Number of figures/tables/graphs                         | 1                     |
| In the following language(s)                            | Original language     |

#### About Your Work

|                           |                                                                                  |
|---------------------------|----------------------------------------------------------------------------------|
| Title of new article      | A Comparison of DER Voltage Regulation Technologies using Real- Time Simulations |
| Lead author               | Adam Summers                                                                     |
| Title of targeted journal | MDPI Energies                                                                    |
| Publisher                 | MDPI                                                                             |
| Expected publication date | Oct 2020                                                                         |

#### Additional Data

|                    |          |
|--------------------|----------|
| Portions           | Figure 1 |
| IEEE membership ID | 91278774 |

|  Requestor Location |                                                                                 |  Tax Details |
|-----------------------------------------------------------------------------------------------------|---------------------------------------------------------------------------------|----------------------------------------------------------------------------------------------|
|                                                                                                     | Sandia National Laboratories<br>MS1033                                          |                                                                                              |
| Requestor Location                                                                                  | ALBUQUERQUE, NM 87185<br>United States<br>Attn: Sandia National<br>Laboratories |                                                                                              |
| <hr/>                                                                                               |                                                                                 |                                                                                              |
|  Price             |                                                                                 |                                                                                              |
| Total                                                                                               | 0.00 USD                                                                        |                                                                                              |
|                                                                                                     |                                                                                 | Total: 0.00 USD                                                                              |
| <a href="#">CLOSE WINDOW</a>                                                                        |                                                                                 | <a href="#">ORDER MORE</a>                                                                   |
